# Supplementary material for: A comparative analysis of the bistability switch for platelet aggregation by logic ODE based dynamical modeling
Source: Royal Society of Chemistry journal article supplement (doi:10.1039/c4mb00170b), 2014-05-22
Supplement: c4mb00170b5.pdf [file c4mb00170b5.pdf]

## HillCube model

### Dynamic variables + starting concentrations

|        |                               |
|--------|-------------------------------|
| Cac    | 0                             |
| P2Y1   | 0                             |
| Rap1   | 0                             |
| Int    | 0                             |
| Src    | 1.00065375076016e-05 (fitted) |
| PTP    | 0.000771458137212347 (fitted) |
| P2Y12  | 0                             |
| PI3K   | 0                             |
| Akt    | 0                             |
| Throm  | 0                             |
| ThromR | 0                             |

### Dynamic parameters

|                |                      |          |
|----------------|----------------------|----------|
| Cac_tau        | 1.14706579612486     | (fitted) |
| Cac_k_P2Y1     | 0.578940473361213    | (fitted) |
| P2Y1_tau       | 1.10488902213936     | (fitted) |
| P2Y1_k_ADP     | 68656.2765082096     | (fitted) |
| P2Y1_k_ADP1    | 4.53681511736711     | (fitted) |
| P2Y1_k_ADP2    | 99934.0229821775     | (fitted) |
| P2Y1_k_ADP3    | 0.000401092879055109 | (fitted) |
| Rap1_tau       | 0.000756375463342874 | (fitted) |
| Rap1_k_Cac     | 0.00120854795019044  | (fitted) |
| Int_tau        | 0.546790100562961    | (fitted) |
| Int_k_Rap1     | 2.69222340259396     | (fitted) |
| Int_k_Akt      | 0.168866125846509    | (fitted) |
| Int_k_ThromR   | 5.14606732385519     | (fitted) |
| Src_tau        | 0.00235492792312395  | (fitted) |
| Src_k_Int      | 0.209190861070864    | (fitted) |
| Src_k_Src      | 1.20908136803667     | (fitted) |
| Src_k_PTP      | 0.00375926842191643  | (fitted) |
| PTP_tau        | 4.25086427682922     | (fitted) |
| PTP_k_PTP      | 0.1039185774936      | (fitted) |
| PTP_k_Src      | 0.0222346816752048   | (fitted) |
| P2Y12_tau      | 2398.41448068728     | (fitted) |
| P2Y12_k_ADP    | 1.00067210175258e-06 | (fitted) |
| P2Y12_k_ADP1   | 0.0142968781106495   | (fitted) |
| P2Y12_k_ADP2   | 0.000167355613819358 | (fitted) |
| P2Y12_k_ADP3   | 0.272565889803558    | (fitted) |
| P2Y12_k_ARC    | 0.000815540865757472 | (fitted) |
| PI3K_tau       | 0.278829201570762    | (fitted) |
| PI3K_k_P2Y12   | 0.314336360772427    | (fitted) |
| Akt_tau        | 0.64781493280581     | (fitted) |
| Akt_k_P2Y12    | 9.6972228581864      | (fitted) |
| Akt_k_Src      | 1.96920190329364     | (fitted) |
| Throm_tau      | 2.41497000853943     | (fitted) |
| Throm_k_Int    | 0.00339158709959841  | (fitted) |
| ThromR_tau     | 2.37908262308191     | (fitted) |
| ThromR_k_Throm | 19.7110914106133     | (fitted) |
| h              | 1                    |          |

### Driving inputs

ADP  
ADP1  
ADP2  
ADP3  
ARC



$$\begin{aligned} & (\text{ARC}^h + \text{P2Y12\_k\_ARC}^h) + \text{ADP}^h / (\text{ADP}^h + \text{P2Y12\_k\_ADP}^h) * (1 - \text{ADP1}^h / (\text{ADP1}^h + \text{P2Y12\_k\_ADP1}^h)) * \text{ADP2}^h / \\ & (\text{ADP2}^h + \text{P2Y12\_k\_ADP2}^h) * \text{ADP3}^h / (\text{ADP3}^h + \text{P2Y12\_k\_ADP3}^h) * (1 - \text{ARC}^h / (\text{ARC}^h + \text{P2Y12\_k\_ARC}^h)) + (1 - \text{ADP}^h / \\ & (\text{ADP}^h + \text{P2Y12\_k\_ADP}^h)) * \text{ADP1}^h / (\text{ADP1}^h + \text{P2Y12\_k\_ADP1}^h) * \text{ADP2}^h / (\text{ADP2}^h + \text{P2Y12\_k\_ADP2}^h) * \text{ADP3}^h / \\ & (\text{ADP3}^h + \text{P2Y12\_k\_ADP3}^h) * (1 - \text{ARC}^h / (\text{ARC}^h + \text{P2Y12\_k\_ARC}^h)) + \text{ADP}^h / (\text{ADP}^h + \text{P2Y12\_k\_ADP}^h) * \text{ADP1}^h / \\ & (\text{ADP1}^h + \text{P2Y12\_k\_ADP1}^h) * \text{ADP2}^h / (\text{ADP2}^h + \text{P2Y12\_k\_ADP2}^h) * \text{ADP3}^h / (\text{ADP3}^h + \text{P2Y12\_k\_ADP3}^h) * (1 - \text{ARC}^h / \\ & (\text{ARC}^h + \text{P2Y12\_k\_ARC}^h)) - \text{P2Y12} / \text{P2Y12\_tau} \end{aligned}$$

$$\mathbf{PI3K:} \quad d\text{PI3K}/dt = (\text{P2Y12}^h / (\text{P2Y12}^h + \text{PI3K\_k\_P2Y12}^h) - \text{PI3K}) / \text{PI3K\_tau}$$

$$\mathbf{Akt:} \quad d\text{Akt}/dt = (\text{P2Y12}^h / (\text{P2Y12}^h + \text{Akt\_k\_P2Y12}^h)) * (1 - \text{Src}^h / (\text{Src}^h + \text{Akt\_k\_Src}^h)) + (1 - \text{P2Y12}^h / (\text{P2Y12}^h + \text{Akt\_k\_P2Y12}^h)) * \text{Src}^h / (\text{Src}^h + \text{Akt\_k\_Src}^h) + \text{P2Y12}^h / (\text{P2Y12}^h + \text{Akt\_k\_P2Y12}^h) * \text{Src}^h / (\text{Src}^h + \text{Akt\_k\_Src}^h) - \text{Akt} / \text{Akt\_tau}$$

$$\mathbf{Throm:} \quad d\text{Throm}/dt = (\text{Int}^h / (\text{Int}^h + \text{Throm\_k\_Int}^h) - \text{Throm}) / \text{Throm\_tau}$$

$$\mathbf{ThromR:} \quad d\text{ThromR}/dt = (\text{Throm}^h / (\text{Throm}^h + \text{ThromR\_k\_Throm}^h) - \text{ThromR}) / \text{ThromR\_tau}$$

### Observation parameters

scale\_Cac\_obs 4.5714654658618 (fitted)  
 scale\_Int\_obs 136.492923059178 (fitted)  
 scale\_Rap1\_obs 0.760176007753641 (fitted)  
 scale\_Akt\_obs 3.01027503632714 (fitted)
