# Supplementary material for: A comparative analysis of the bistability switch for platelet aggregation by logic ODE based dynamical modeling
Source: Royal Society of Chemistry journal article supplement (doi:10.1039/c4mb00170b), 2014-05-22
Supplement: c4mb00170b6.pdf [file c4mb00170b6.pdf]

## mass action model

### Dynamic variables + starting concentrations

|            |                               |
|------------|-------------------------------|
| P2Y12      | 1.40084643502425 (fitted)     |
| P2Y12_act  | 0                             |
| P2Y12_ARC  | 0                             |
| P2Y1       | 1.84098730107818 (fitted)     |
| P2Y1_act   | 0                             |
| P2Y1_MSR   | 0                             |
| Cadts      | 95540.2412026579 (fitted)     |
| Cac        | 0.000120392444466385 (fitted) |
| Rap1       | 10.3189716986701 (fitted)     |
| aRap1      | 1.00525729588068e-05 (fitted) |
| PI3K       | 34768.079285122 (fitted)      |
| aPI3K      | 35794.6630239584 (fitted)     |
| Akt        | 0.0259785232696396 (fitted)   |
| aAkt       | 0.0281407868019933 (fitted)   |
| Int        | 3101.44824671293 (fitted)     |
| aInt       | 0                             |
| PTP        | 1.60706272926785 (fitted)     |
| aPTP       | 3.16865763058907 (fitted)     |
| Src        | 2509.00865150426 (fitted)     |
| aSrc       | 0.214676780914537 (fitted)    |
| Throm      | 0                             |
| ThromR     | 0.0416829526983803 (fitted)   |
| ThromR_act | 0                             |

### Dynamic parameters

|                       |                               |
|-----------------------|-------------------------------|
| P2Y1_activation       | 0.000140135104666352 (fitted) |
| P2Y12_activation      | 7.23910903203781 (fitted)     |
| P2Y1_inhibition       | 1.43090897924936 (fitted)     |
| P2Y12_inhibition      | 5.06830056587005 (fitted)     |
| P2Y1_deactivation     | 0.973677319443713 (fitted)    |
| P2Y12_deactivation    | 4.17955372482896 (fitted)     |
| Ca_release            | 3.73597289923005 (fitted)     |
| Ca_reuptake           | 0.988207242150881 (fitted)    |
| Rap1_activation       | 2.38531767765998e-05 (fitted) |
| Rap1_deactivation     | 0.05254013086997 (fitted)     |
| Src_activation_Int    | 119.375494432195 (fitted)     |
| Src_activation_Src    | 0.277631432433337 (fitted)    |
| Src_deactivation_PTP  | 0.000845768418704683 (fitted) |
| Src_deactivation      | 0.273907861938351 (fitted)    |
| PTP_activation_PTP    | 0.11034028481118 (fitted)     |
| PTP_deactivation_Src  | 0.282178348609175 (fitted)    |
| PTP_deactivation      | 0.240178855565488 (fitted)    |
| Akt_activation        | 0.274158354533438 (fitted)    |
| Akt_deactivation      | 1324.82746229713 (fitted)     |
| Int_activation_Rap1   | 91.156430556807 (fitted)      |
| Int_activation_Akt    | 5.10770739737398e-05 (fitted) |
| Int_activation_ThromR | 0.000103015467170691 (fitted) |
| Akt_activation_Src    | 1821.86567577199 (fitted)     |
| Int_deactivation      | 99983.0216029571 (fitted)     |
| Throm_production      | 1260.65204508931 (fitted)     |
| ThromR_activation     | 2168.50287464957 (fitted)     |
| ThromR_deactivation   | 0.00114390086613387 (fitted)  |
| ADP_input1            | 0.112395872926789 (fitted)    |
| ADP_input2            | 0.686217869630415 (fitted)    |
| ADP_input3            | 9.99468128647925 (fitted)     |
| PI3K_activation       | 0.249023655452825 (fitted)    |

PI3K\_deactivation 0.186728976789345 (fitted)

### Driving inputs

ADP  
ADP1  
ADP2  
ADP3  
ARC  
MSR

### Ordinary differential equations

**P2Y12:**  $dP2Y12/dt = -P2Y12\_activation * P2Y12 * ADP - P2Y12 * ADP1 * P2Y12\_activation * ADP\_input1 - P2Y12 * ADP2 * P2Y12\_activation * ADP\_input2 - P2Y12 * ADP3 * P2Y12\_activation * ADP\_input3 + P2Y12\_deactivation * P2Y12\_act - P2Y12\_inhibition * P2Y12 * ARC;$

**P2Y12\_act:**  $dP2Y12\_act/dt = P2Y12\_activation * P2Y12 * ADP + P2Y12 * ADP1 * P2Y12\_activation * ADP\_input1 + P2Y12 * ADP2 * P2Y12\_activation * ADP\_input2 + P2Y12 * ADP3 * P2Y12\_activation * ADP\_input3 - P2Y12\_deactivation * P2Y12\_act;$

**P2Y12\_ARC:**  $dP2Y12\_ARC/dt = P2Y12\_inhibition * P2Y12 * ARC;$

**P2Y1:**  $dP2Y1/dt = -P2Y1\_activation * P2Y1 * ADP - P2Y1 * ADP1 * P2Y1\_activation * ADP\_input1 - P2Y1 * ADP2 * P2Y1\_activation * ADP\_input2 - P2Y1 * ADP3 * P2Y1\_activation * ADP\_input3 + P2Y1\_deactivation * P2Y1\_act - P2Y1\_inhibition * P2Y1 * MSR;$

**P2Y1\_act:**  $dP2Y1\_act/dt = P2Y1\_activation * P2Y1 * ADP + P2Y1 * ADP1 * P2Y1\_activation * ADP\_input1 + P2Y1 * ADP2 * P2Y1\_activation * ADP\_input2 + P2Y1 * ADP3 * P2Y1\_activation * ADP\_input3 - P2Y1\_deactivation * P2Y1\_act;$

**P2Y1\_MSR:**  $dP2Y1\_MSR/dt = P2Y1\_inhibition * P2Y1 * MSR;$

**Cadts:**  $dCadts/dt = -Ca\_release * Cadts * P2Y1\_act + Ca\_reuptake * Cac;$

**Cac:**  $dCac/dt = Ca\_release * Cadts * P2Y1\_act - Ca\_reuptake * Cac;$

**Rap1:**  $dRap1/dt = -Rap1\_activation * Rap1 * Cac + Rap1\_deactivation * aRap1;$

**aRap1:**  $daRap1/dt = Rap1\_activation * Rap1 * Cac - Rap1\_deactivation * aRap1;$

**PI3K:**  $dPI3K/dt = -PI3K\_activation * PI3K * P2Y12\_act + PI3K\_deactivation * aPI3K;$

**aPI3K:**  $daPI3K/dt = PI3K\_activation * PI3K * P2Y12\_act - PI3K\_deactivation * aPI3K;$

**Akt:**  $dAkt/dt = -Akt * (Akt\_activation * aPI3K + Akt\_activation\_Src * aSrc) + Akt\_deactivation * aAkt;$

**aAkt:**  $daAkt/dt = Akt * (Akt\_activation * aPI3K + Akt\_activation\_Src * aSrc) - Akt\_deactivation * aAkt;$

**Int:**  $dInt/dt = -Int * (Int\_activation\_Rap1 * aRap1 + Int\_activation\_Akt * aAkt + Int\_activation\_ThromR * ThromR\_act) + Int\_deactivation * aInt;$

**aInt:**  $daInt/dt = Int * (Int\_activation\_Rap1 * aRap1 + Int\_activation\_Akt * aAkt + Int\_activation\_ThromR * ThromR\_act) - Int\_deactivation * aInt;$

**PTP:**  $dPTP/dt = -PTP\_activation\_PTP * PTP * aPTP + aPTP * (PTP\_deactivation + PTP\_deactivation\_Src * aSrc);$

**aPTP:**  $daPTP/dt = PTP\_activation\_PTP * PTP * aPTP - aPTP * (PTP\_deactivation + PTP\_deactivation\_Src * aSrc);$

**Src:**  $dSrc/dt = -Src * (Src\_activation\_Int * aInt + Src\_activation\_Src * aSrc) + aSrc * (Src\_deactivation + Src\_deactivation\_PTP * aPTP);$

**aSrc:**  $daSrc/dt = Src*(Src\_activation\_Int*aInt+Src\_activation\_Src*aSrc) - aSrc*(Src\_deactivation+Src\_deactivation\_PTP*aPTP);$

**Throm:**  $dThrom/dt = Throm\_production * aInt;$

**ThromR:**  $dThromR/dt = -ThromR\_activation *ThromR * Throm + ThromR\_deactivation *ThromR\_act;$

**ThromR\_act:**  $dThromR\_act/dt = ThromR\_activation *ThromR * Throm - ThromR\_deactivation *ThromR\_act;$

### **Observation parameters**

|               |                            |
|---------------|----------------------------|
| scale_Int_obs | 155.981670362146 (fitted)  |
| scale_Cac_obs | 0.111105373443797 (fitted) |
| scale_Rap_obs | 1.63434956513586 (fitted)  |
| scale_Akt_obs | 5.94070243611829 (fitted)  |
