# Supplementary material for: A comparative analysis of the bistability switch for platelet aggregation by logic ODE based dynamical modeling
Source: Royal Society of Chemistry journal article supplement (doi:10.1039/c4mb00170b), 2014-05-22
Supplement: c4mb00170b7.pdf [file c4mb00170b7.pdf]

## SQUAD model

### Dynamic variables + starting concentrations

|        |                               |
|--------|-------------------------------|
| P2Y12  | 0                             |
| P2Y1   | 0                             |
| Cac    | 0                             |
| Rap1   | 0                             |
| Akt    | 0                             |
| Int    | 0                             |
| Src    | 1.81275146707658e-05 (fitted) |
| PI3K   | 0                             |
| PTP    | 12208.5498972262 (fitted)     |
| Throm  | 0                             |
| ThromR | 0                             |

### Dynamic parameters

|              |                               |
|--------------|-------------------------------|
| P2Y1_decay   | 0.473605541589502 (fitted)    |
| P2Y12_decay  | 1.311224584243 (fitted)       |
| P2Y1_Cac     | 0.262564903033411 (fitted)    |
| Cac_reuptake | 1.16006274259696 (fitted)     |
| Rap1_Cac     | 2.98605802899337e-05 (fitted) |
| Rap1_deact   | 0.115178489403329 (fitted)    |
| Akt_PI3K     | 0.0928794298272352 (fitted)   |
| Akt_Src      | 18.0666459776589 (fitted)     |
| Akt_deact    | 6.55297153762532 (fitted)     |
| Int_Akt      | 38078.3609932499 (fitted)     |
| Int_Rap1     | 0.476931510419281 (fitted)    |
| Int_ThromR   | 17.5203571996 (fitted)        |
| Int_deact    | 1.00168195221449 (fitted)     |
| Src_Src      | 3.50022125981342 (fitted)     |
| Src_PTP      | 29479.7033034441 (fitted)     |
| PTP_Src      | 2.1894335236633 (fitted)      |
| PTP_PTP      | 0.00192534456141202 (fitted)  |
| PTP_deact    | 5.90147225148781 (fitted)     |
| Src_Int      | 0.000212925981051457 (fitted) |
| Src_deact    | 0.474687549992427 (fitted)    |
| PI3K_P2Y12   | 3.54074679376809 (fitted)     |
| PI3K_deact   | 190.994110206951 (fitted)     |
| Throm_Int    | 3744.26406968954 (fitted)     |
| Throm_deact  | 9.37989945700861 (fitted)     |
| ThromR_Throm | 0.0407260335395034 (fitted)   |
| ThromR_deact | 5.73705603581402 (fitted)     |
| h            | 9.32960030789937 (fitted)     |
| ADP_input1   | 0.69480527783859 (fitted)     |
| ADP_input2   | 0.500402671297665 (fitted)    |
| ADP_input3   | 0.570849010355235 (fitted)    |

### Driving inputs

ADP  
ADP1  
ADP2  
ADP3  
ARC  
MSR

## Ordinary differential equations

**P2Y1:**  $dP2Y1/dt = -P2Y1\_decay*P2Y1+ADP+ADP1*ADP\_input1+ADP2*ADP\_input2+ADP3*ADP\_input3*(1-MSR)$

**P2Y12:**  $dP2Y12/dt = (-P2Y12\_decay*P2Y12+ADP+ADP1*ADP\_input1+ADP2*ADP\_input2+ADP3*ADP\_input3)*(1-ARC)$

**Cac:**  $dCac/dt = ((-exp(0.5*h)+exp(-h*(((1+P2Y1\_Cac)/(P2Y1\_Cac))*((P2Y1\_Cac*P2Y1)/(1+P2Y1\_Cac*P2Y1))-0.5)))/((1-exp(0.5*h))*(1+exp(-h*(((1+P2Y1\_Cac)/(P2Y1\_Cac))*((P2Y1\_Cac*P2Y1)/(1+P2Y1\_Cac*P2Y1))-0.5)))))-(Cac\_reuptake*Cac)$

**Rap1:**  $dRap1/dt = ((-exp(0.5*h)+exp(-h*(((1+Rap1\_Cac)/(Rap1\_Cac))*((Rap1\_Cac*Cac)/(1+Rap1\_Cac*Cac))-0.5)))/((1-exp(0.5*h))*(1+exp(-h*(((1+Rap1\_Cac)/(Rap1\_Cac))*((Rap1\_Cac*Cac)/(1+Rap1\_Cac*Cac))-0.5)))))-(Rap1\_deact*Rap1)$

**Akt:**  $dAkt/dt = ((-exp(0.5*h)+exp(-h*(((1+Akt\_PI3K+Akt\_Src)/(Akt\_PI3K+Akt\_Src))*((Akt\_PI3K*PI3K+Akt\_Src*Src)/(1+Akt\_PI3K*PI3K+Akt\_Src*Src))-0.5)))/((1-exp(0.5*h))*(1+exp(-h*(((1+Akt\_PI3K+Akt\_Src)/(Akt\_PI3K+Akt\_Src))*((Akt\_PI3K*PI3K+Akt\_Src*Src)/(1+Akt\_PI3K*PI3K+Akt\_Src*Src))-0.5)))))-(Akt\_deact*Akt)$

**Int:**  $dInt/dt = ((-exp(0.5*h)+exp(-h*(((1+Int\_Rap1+Int\_ThromR+Int\_Akt)/(Int\_Rap1+Int\_ThromR+Int\_Akt))*((Int\_Rap1*Rap1+Int\_ThromR*ThromR+Int\_Akt*Akt)/(1+Int\_Rap1*Rap1+Int\_ThromR*ThromR+Int\_Akt*Akt))-0.5)))/((1-exp(0.5*h))*(1+exp(-h*(((1+Int\_Rap1+Int\_ThromR+Int\_Akt)/(Int\_Rap1+Int\_ThromR+Int\_Akt))*((Int\_Rap1*Rap1+Int\_ThromR*ThromR+Int\_Akt*Akt)/(1+Int\_Rap1*Rap1+Int\_ThromR*ThromR+Int\_Akt*Akt))-0.5)))))-(Int\_deact*Int)$

**Src:**  $dSrc/dt = ((-exp(0.5*h)+exp(-h*(((1+Src\_Int+Src\_Src)/(Src\_Int+Src\_Src))*((Src\_Int*Int+Src\_Src*Src)/(1+Src\_Int*Int+Src\_Src*Src))*((1-((1+Src\_PTP)/(Src\_PTP))*((Src\_PTP*PTP)/(1+Src\_PTP*PTP)))-0.5)))/((1-exp(0.5*h))*(1+exp(-h*(((1+Src\_Int+Src\_Src)/(Src\_Int+Src\_Src))*((Src\_Int*Int+Src\_Src*Src)/(1+Src\_Int*Int+Src\_Src*Src))*((1-((1+Src\_PTP)/(Src\_PTP))*((Src\_PTP*PTP)/(1+Src\_PTP*PTP)))-0.5)))))-(Src\_deact*Src)$

**PTP:**  $dPTP/dt = ((-exp(0.5*h)+exp(-h*(((1+PTP\_PTP)/(PTP\_PTP))*((PTP\_PTP*PTP)/(1+PTP\_PTP*PTP)))*((1-((1+PTP\_Src)/(PTP\_Src))*((PTP\_Src*Src)/(1+PTP\_Src*Src)))-0.5)))/((1-exp(0.5*h))*(1+exp(-h*(((1+PTP\_PTP)/(PTP\_PTP))*((PTP\_PTP*PTP)/(1+PTP\_PTP*PTP)))*((1-((1+PTP\_Src)/(PTP\_Src))*((PTP\_Src*Src)/(1+PTP\_Src*Src)))-0.5)))))-(PTP\_deact*PTP)$

**PI3K:**  $dPI3K/dt = ((-exp(0.5*h)+exp(-h*(((1+PI3K\_P2Y12)/(PI3K\_P2Y12))*((PI3K\_P2Y12*P2Y12)/(1+PI3K\_P2Y12*P2Y12))-0.5)))/((1-exp(0.5*h))*(1+exp(-h*(((1+PI3K\_P2Y12)/(PI3K\_P2Y12))*((PI3K\_P2Y12*P2Y12)/(1+PI3K\_P2Y12*P2Y12))-0.5)))))-(PI3K\_deact*PI3K)$

**Throm:**  $dThrom/dt = ((-exp(0.5*h)+exp(-h*(((1+Throm\_Int)/(Throm\_Int))*((Throm\_Int*Int)/(1+Throm\_Int*Int))-0.5)))/((1-exp(0.5*h))*(1+exp(-h*(((1+Throm\_Int)/(Throm\_Int))*((Throm\_Int*Int)/(1+Throm\_Int*Int))-0.5)))))-(Throm\_deact*Throm)$

**ThromR:**  $dThromR/dt = ((-exp(0.5*h)+exp(-h*(((1+ThromR\_Throm)/(ThromR\_Throm))*((ThromR\_Throm*Throm)/(1+ThromR\_Throm*Throm))-0.5)))/((1-exp(0.5*h))*(1+exp(-h*(((1+ThromR\_Throm)/(ThromR\_Throm))*((ThromR\_Throm*Throm)/(1+ThromR\_Throm*Throm))-0.5)))))-(ThromR\_deact*ThromR)$

## Observation parameters

|               |                            |
|---------------|----------------------------|
| scale_Int_obs | 1                          |
| scale_Cac_obs | 0.991926388154692 (fitted) |
| scale_Rap_obs | 0.759324549929283 (fitted) |
| scale_Akt_obs | 75119.9143231632 (fitted)  |
