# Supplementary material for: A comparative analysis of the bistability switch for platelet aggregation by logic ODE based dynamical modeling
Source: Royal Society of Chemistry journal article supplement (doi:10.1039/c4mb00170b), 2014-05-22
Supplement: c4mb00170b8.pdf [file c4mb00170b8.pdf]

## Information for supplemental material

### 1. Conversion to SQUAD ODEs:

Open the file `convert_to_squadODEs.m` in the Matlab editor and enter the network topology in the described way. The script produces a Potterswheel model definition file named `squadODEs.m`, which can directly be loaded into Potterswheel for parameter estimation and further analyses.

### 2. Conversion to HillCube ODEs:

HillCube conversion makes use of files from the modeling tool Odefy (Krumisiek et al. 2010), make sure, the files `ExpressionsToOdefy.m`, `CreateCubeCallsPW.m` and `validvarname.m` are on the Matlab path. Odefy does not need to be installed, all necessary files are included in this supplement. Open the file `convert_to_HillcubeODEs.m` in the Matlab editor and enter the Boolean rules of your model in the described way. The script produces a Potterswheel model definition file named `hillcubeODEs.m`, which can directly be loaded into Potterswheel for parameter estimation and further analyses.

### 3. Models

The files `mass-action.pdf`, `squad.pdf` and `hillcube.pdf` contain the differential equations and parameters of the examined models.

Krumisiek J, Pölsterl S, Wittmann DM, Theis FJ. Odefy--from discrete to continuous models. *BMC Bioinformatics*. 2010 May 7;11:233. doi: 10.1186/1471-2105-11-233.
